# Supplementary material for: Risk factors for worsening renal function and their association with long-term mortality following transcatheter aortic valve implantation: data from the SWEDEHEART registry
Source: PubMed Central journal article supplement — Open Heart. 2017 Jun 12;4(2):e000554. doi: 10.1136/openhrt-2016-000554 (PMC5515170; doi:10.1136/openhrt-2016-000554), 2017-06-12
Supplement: openhrt-2016-000554supp001.pdf [file openhrt-2016-000554supp001.pdf]

## Supplemental material

**Supplemental table 1.** Baseline characteristics according to gender

| Factor                                                                | Female      | Male        | p-value |
|-----------------------------------------------------------------------|-------------|-------------|---------|
| N                                                                     | 760         | 780         |         |
| Age (years), mean (SD)                                                | 83 (7)      | 81 (7)      | <0.001  |
| Baseline creatinine (mmol/L), mean (SD)                               | 91 (29)     | 111 (39)    | <0.001  |
| eGFR at baseline (ml/min/1.73m <sup>2</sup> ), mean (SD)              | 57 (20)     | 61 (22)     | 0.001   |
| AKI according to VARC-2-criteria                                      | 27 (3.6%)   | 67 (8.6%)   | <0.001  |
| VARC-2-criteria                                                       |             |             |         |
| 1.5-1.99x increase or 26 mmol/L in creatinine                         | 23 (85%)    | 55 (82%)    | 0.94    |
| 2-2.9x increase in creatinine                                         | 1 (4%)      | 3 (4%)      |         |
| >=3x increase in creatinine/renal replacement therapy                 | 3 (11%)     | 9 (13%)     |         |
| Percentage change in creatinine from baseline to discharge, mean (SD) | -5.3 (22)   | -1.4 (25)   | 0.001   |
| Change in creatinine from baseline to discharge                       |             |             |         |
| ≥25% in creatinine                                                    | 47 (6.2%)   | 62 (7.9%)   | 0.18    |
| ≥ 50% increase in creatinine                                          | 2 (0.3%)    | 3 (0.4%)    | 0.68    |
| ≥26 mmol/L increase in creatinine                                     | 25 (3.3%)   | 63 (8.1%)   | <0.001  |
| Received dialysis                                                     | 2 (0.3%)    | 8 (1.0%)    | 0.063   |
| 4 CKD grupper vid baselin (excluding eGFR <15)                        |             |             |         |
| ≥60                                                                   | 314 (41.3%) | 375 (48.1%) | 0.015   |
| 45-59                                                                 | 217 (28.6%) | 219 (28.1%) |         |
| 30-44                                                                 | 182 (23.9%) | 141 (18.1%) |         |
| 15-29                                                                 | 47 (6.2%)   | 45 (5.8%)   |         |
| Weight (kg), mean (SD)                                                | 68 (15)     | 80 (15)     | <0.001  |
| Height (cm), mean (SD)                                                | 161 (6)     | 17 (7)      | <0.001  |
| Body surface area, mean (SD)                                          | 1.7 (0.2)   | 1.9 (0.2)   | <0.001  |
| Diabetes mellitus                                                     | 147 (19.3%) | 193 (24.7%) | 0.011   |

|                                                      |             |             |        |
|------------------------------------------------------|-------------|-------------|--------|
| Known hypertension                                   | 548 (72.1%) | 564 (72.3%) | 0.93   |
| COPD                                                 | 144 (18.9%) | 167 (21.4%) | 0.23   |
| Prior cardiac surgery                                | 126 (16.6%) | 327 (41.9%) | <0.001 |
| Prior PCI                                            | 178 (23.4%) | 268 (34.4%) | <0.001 |
| Prior stroke                                         | 95 (12.5%)  | 127 (16.3%) | 0.035  |
| Known peripheral arterial disease                    | 147 (19.3%) | 167 (21.4%) | 0.31   |
| Atrial fibrillation                                  | 265 (34.9%) | 281 (36.0%) | 0.64   |
| NYHA class                                           |             |             |        |
| NYHA 1                                               | 2 (0.3%)    | 4 (0.5%)    | 0.019  |
| NYHA 2                                               | 38 (5.0%)   | 68 (8.7%)   |        |
| NYHA 3                                               | 593 (78.2%) | 570 (73.1%) |        |
| NYHA 4                                               | 125 (16.5%) | 138 (17.7%) |        |
| Logistic Euroscore, mean (SD)                        | 22% (13)    | 22 (15)     | 0.47   |
| Urgent TAVI                                          | 5 (0.7%)    | 12 (1.5%)   | 0.098  |
| Make of prosthesis                                   |             |             |        |
| Core-Valve                                           | 385 (50.7%) | 439 (56.3%) | <0.001 |
| Edwards                                              | 324 (42.7%) | 320 (41.0%) |        |
| Other                                                | 50 (6.6%)   | 21 (2.7%)   |        |
| Aortic valve area (cm <sup>2</sup> ), mean (SD)      | 0.6 (0.2)   | 0.7 (0.2)   | <0.001 |
| Max aortic valve gradient (mmHg), mean (SD)          | 83 (25)     | 75 (21)     | <0.001 |
| Mean aortic valve gradient (mmHg), mean (SD)         | 51 (17)     | 46 (14)     | <0.001 |
| Annulus diameter (mm), mean (SD)                     | 22 (2.2)    | 24.7 (2.6)  | <0.001 |
| LVEF %                                               |             |             |        |
| LVEF ≥50%                                            | 517 (68.2%) | 407 (52.2%) | <0.001 |
| LVEF 40-40%                                          | 121 (16.0%) | 148 (19.0%) |        |
| LVEF 30-39%                                          | 83 (10.9%)  | 133 (17.1%) |        |
| LVEF ≤30                                             | 37 (4.9%)   | 91 (11.7%)  |        |
| Systolic pulmonary artery pressure (mmHg), mean (SD) | 45 (15)     | 44 (15)     | 0.41   |
| Aortic regurgitation (0-3)                           |             |             |        |
| 0                                                    | 270 (36.0%) | 273 (35.3%) | 0.072  |

|                                                       |   |             |             |       |
|-------------------------------------------------------|---|-------------|-------------|-------|
|                                                       | 1 | 386 (51.4%) | 423 (54.7%) |       |
|                                                       | 2 | 83 (11.1%)  | 59 (7.6%)   |       |
|                                                       | 3 | 12 (1.6%)   | 19 (2.5%)   |       |
| Mitral regurgitation (0-3)                            |   |             |             |       |
|                                                       | 0 | 168 (22.5%) | 212 (27.6%) | 0.012 |
|                                                       | 1 | 430 (57.6%) | 443 (57.6%) |       |
|                                                       | 2 | 129 (17.3%) | 104 (13.5%) |       |
|                                                       | 3 | 20 (2.7%)   | 10 (1.3%)   |       |
| Contrast volume (ml), mean (SD)                       |   |             |             |       |
|                                                       |   | 105 (739)   | 118 (84)    | 0.001 |
| Contrast volume/Creatinine clearance-ratio, mean (SD) |   |             |             |       |
|                                                       |   | 2.5 (2.1)   | 2.3 (1.9)   | 0.039 |
| <3 ml/CrCl                                            |   |             |             |       |
|                                                       |   | 554 (73.0%) | 583 (75.0%) | 0.63  |
| 3-3.9 ml/CrCl                                         |   |             |             |       |
|                                                       |   | 90 (11.9%)  | 88 (11.3%)  |       |
| ≥4 ml/CrCl                                            |   |             |             |       |
|                                                       |   | 115 (15.2%) | 106 (13.6%) |       |
| Fluoroscopy time (min), mean (SD)                     |   |             |             |       |
|                                                       |   | 1407 (1024) | 1445 (1134) | 0.49  |
| Peri/Post-procedural bleeding                         |   |             |             |       |
|                                                       |   | 72 (%)      | 51 (%)      | 0.034 |
| Length of in-hospital stay (days), mean (SD)          |   |             |             |       |
|                                                       |   | 7.4 (12)    | 6.8 (11)    | 0.28  |

**Supplemental table 2.** Gender distribution according to different definitions of persistent acute kidney injury.

| Factor                                                                                                                         | Female    | Male      | Total | p-value<br>(Chi2) |
|--------------------------------------------------------------------------------------------------------------------------------|-----------|-----------|-------|-------------------|
| N                                                                                                                              | 767       | 794       |       |                   |
| AKI according to VARC2-criteria                                                                                                | 27 (3.6%) | 67 (8.6%) | 94    | <0.001            |
| ≥25% increase in creatinine or initiation of dialysis                                                                          | 49 (6.4%) | 68 (8.6%) | 117   | 0.093             |
| RIFLE-criteria: ≥R<br>≥25% absolute increase in eGFR (CKDEPI),<br>or ≥150% increase in creatinine or initiation<br>of dialysis | 38 (5.0%) | 65 (8.3%) | 103   | 0.009             |

**Supplemental table 3.** Predictors of persistent AKI according to different definitions of AKI

|                                            | <b>VARC-2</b>                    |         | <b>≥25% absolute increase in creatinine or dialysis</b> |         | <b>≥R in RIFLE-criteria:<br/>≥25% decrease in eGFR (CKDEPI) or ≥150% increase in creatinine or dialysis</b> |         |
|--------------------------------------------|----------------------------------|---------|---------------------------------------------------------|---------|-------------------------------------------------------------------------------------------------------------|---------|
|                                            | <b>Multivariable OR* (95%CI)</b> | p-value | <b>Multivariable OR* (95%CI)</b>                        | p-value | <b>Multivariable OR* (95%CI)</b>                                                                            | p-value |
| Age/10 year increase                       | 0.85 (0.63-1.16)                 | 0.312   | 1.01 (0.76-1.34)                                        | 0.951   | 0.96 (0.72-1.30)                                                                                            | 0.802   |
| eGFR/10 ml/min/1.73m <sup>2</sup> increase | 0.88 (0.79-0.98)                 | 0.019   | 1.09 (0.99-1.19)                                        | 0.075   | 1.07 (0.98-1.18)                                                                                            | 0.150   |
| Contrast volume per 10 ml increase         | 1.02 (1.00-1.05)                 | 0.052   | 1.02 (0.99-1.04)                                        | 0.178   | 1.02 (0.99-1.04)                                                                                            | 0.118   |
| Male                                       | 2.68 (1.63-4.38)                 | <0.001  | 1.32 (0.88-2.00)                                        | 0.184   | 1.71 (1.09-2.68)                                                                                            | 0.019   |
| Known diabetes                             | 1.09 (0.66-1.80)                 | 0.735   | 1.22 (0.78-1.92)                                        | 0.388   | 1.22 (0.75-1.96)                                                                                            | 0.425   |
| LVEF >50%                                  | 1.0 (ref)                        |         | 1.0 (ref)                                               |         | 1.0 (ref)                                                                                                   |         |
| LVEF 40-49%                                | 1.02 (0.57-1.81)                 | 0.955   | 0.79 (0.45-1.37)                                        | 0.396   | 0.90 (0.51-1.60)                                                                                            | 0.716   |
| LVEF 30-39%                                | 1.18 (0.66-2.12)                 | 0.580   | 1.18 (0.69-2.04)                                        | 0.539   | 1.26 (0.71-2.23)                                                                                            | 0.437   |
| LVEF <30%                                  | 0.74 (0.32-1.72)                 | 0.489   | 0.94 (0.45-1.98)                                        | 0.879   | 1.08 (0.51-2.30)                                                                                            | 0.838   |
| COPD                                       | 1.59 (0.99-2.59)                 | 0.057   | 1.59 (1.03-2.46)                                        | 0.038   | 1.45 (0.91-2.32)                                                                                            | 0.118   |
| Bleeding complication                      | 1.64 (0.81-3.33)                 | 0.169   | 1.58 (0.85-2.95)                                        | 0.150   | 1.93 (1.03-3.62)                                                                                            | 0.042   |
| Access site                                | 1.0 (Ref transfemoral)           |         | 1.0 (Ref transfemoral)                                  |         | 1.0 (Ref transfemoral)                                                                                      |         |
| Apical                                     | 2.23 (1.35-3.69)                 | 0.002   | 1.83 (1.14-2.93)                                        | 0.012   | 1.89 (1.15-3.11)                                                                                            | 0.012   |
| Subclavia                                  | 1.34 (0.30-5.94)                 | 0.697   | 1.37 (0.40-4.72)                                        | 0.615   | 1.67 (0.48-5.82)                                                                                            | 0.412   |
| Direct aortic                              | 3.54 (0.95-13.3)                 | 0.060   | 2.28 (0.63-8.16)                                        | 0.207   | 2.84 (0.78-10.2)                                                                                            | 0.112   |
| Prior CABG/PCI                             | 0.90 (0.57-1.42)                 | 0.658   | 0.96 (0.64-1.44)                                        | 0.834   | 0.85 (0.55-1.30)                                                                                            | 0.453   |

**Supplemental table 4.** Multivariate adjusted 1-year mortality according to the 3 different AKI definitions and for male gender.

|                                                                            | Multivariable adjusted<br>HR 95% CI | p-value |
|----------------------------------------------------------------------------|-------------------------------------|---------|
| <b>Model 1*</b>                                                            |                                     |         |
| VARC-2                                                                     | 2.68 (1.76-4.09)                    | <0.001  |
| Male gender                                                                | 1.56 (1.10-2.21)                    | 0.012   |
| <b>Model 2*</b>                                                            |                                     |         |
| ≥25% increase in creatinine or dialysis                                    | 2.14 (1.38-3.29)                    | 0.001   |
| Male gender                                                                | 1.66 (1.18-2.34)                    | 0.004   |
| <b>Model 3*</b>                                                            |                                     |         |
| ≥25% decrease in eGFR (CKDEPI) or ≥150% increase in creatinine or dialysis | 2.02 (1.28-3.20)                    | 0.003   |
| Male gender                                                                | 1.65 (1.17-2.32)                    | 0.004   |

\* Adjusted for the same variables as in the main analysis (see table 3).
